# Supplementary material for: Quantification of the role of stabilized Criegee intermediates in the formation of aerosols in limonene ozonolysis
Source: Copernicus journal article supplement (doi:10.5194/acp-2020-741), 2020-08-12
Supplement: Supplementary file 1 [file acp-2020-741-supplement.pdf]

*Supplement of*

## **Quantification of the Role of Stabilized Criegee Intermediates in the Formation of Aerosols in Limonene Ozonolysis**

Y. W. Gong and Z. M. Chen

*Correspondence to: Z. M. Chen (zmchen@pku.edu.cn)*

### **Chemicals used in this study**

This study used the following: R-(+)-Limonene (Sigma-Aldrich,  $\geq 99.0\%$ ), 2-butanol (Sigma-Aldrich,  $\geq 99.5\%$ ), acetic acid (Sigma-Aldrich,  $\geq 99.7\%$ ), ultrapure water (18M $\Omega$ , Millipore), N<sub>2</sub> ( $\geq 99.999\%$ , Beijing Haikeyuanchuang Practical Gas Company Limited, Beijing, China), O<sub>2</sub> ( $\geq 99.999\%$ , Beijing Haikeyuanchuang Practical Gas Company Limited, Beijing, China).

### **The wall loss fraction of SOA mass concentration**

The wall loss fraction of SOA mass concentration is calculated as Eq. (S1):

$$F_{wall\ loss} = ([In] - [Out])/[In] \quad (S1)$$

where  $F_{wall\ loss}$  is the wall loss fraction of SOA mass concentration, [In] and [Out] are the SOA mass concentrations at the inlet and outlet of the reactor. Wall loss fractions at different relative humidity (RH) are shown in Table S1.

## Calculating the amount of SCIs consumed by water

Here the amount of SCIs consumed by water could not be derived directly, and it was calculated through the reaction rate ratio of SCIs reaction with water and AA as Eqs.

(S2) and (S3):

$$\frac{SCI_{H_2O}}{SCI_{AA}} = \frac{k_{(SCI+H_2O)I} \cdot [H_2O] \cdot SCI_I}{k_{(SCI+AA)} \cdot [AA] \cdot SCI_{Total}} \quad (S2)$$

$$SCI_{H_2O} = \frac{k_{(SCI+H_2O)I} \cdot [H_2O] \cdot 0.545}{k_{(SCI+AA)} \cdot [AA]} \cdot \Delta AA \quad (S3)$$

where  $SCI_{H_2O}$  (molecule  $\text{cm}^{-3}$ ) is the amount of SCIs reacted with  $\text{H}_2\text{O}$ ;  $SCI_{AA}$  (molecule  $\text{cm}^{-3}$ ) is the amount of SCIs reacted with AA;  $k_{(SCI+H_2O)I}$  ( $\text{cm}^3 \text{ molecule}^{-1} \text{ s}^{-1}$ ) is the rate constant of  $SCI_I$  reaction with  $\text{H}_2\text{O}$ ;  $k_{(SCI+AA)}$  ( $\text{cm}^3 \text{ molecule}^{-1} \text{ s}^{-1}$ ) is the rate constant of SCIs reaction with AA;  $[H_2O]$  (molecule  $\text{cm}^{-3}$ ) is the concentration of  $\text{H}_2\text{O}$ ;  $[AA]$  (molecule  $\text{cm}^{-3}$ ) is the concentration of AA;  $SCI_I$  (molecule  $\text{cm}^{-3}$ ) is the amount of  $SCI_I$  generated;  $SCI_{Total}$  (molecule  $\text{cm}^{-3}$ ) is the amount of total SCIs generated;  $\Delta AA$  (molecule  $\text{cm}^{-3}$ ) is the amount of AA consumed.

## $SCI_I$ reaction with $\text{H}_2\text{O}$ and $(\text{H}_2\text{O})_2$

To acquire the reaction rate ratio of SCIs reaction with water and AA, it should be figured out whether the reaction with  $\text{H}_2\text{O}$  or  $(\text{H}_2\text{O})_2$  dominants in  $SCI_I$  reaction with water. This problem was discussed by estimating the generation of  $\text{H}_2\text{O}_2$ , which is a major product formed from  $SCI_I$  reaction with water (Hasson et al., 2001; Winterhalter et al., 2000). The dependence of  $\text{H}_2\text{O}_2$  yield on RH reported in our previous study is shown in Fig. S2 (Gong et al., 2018), we estimated the formation of

H<sub>2</sub>O<sub>2</sub> based on SCI<sub>I</sub> reaction with H<sub>2</sub>O and SCI<sub>I</sub> reaction with (H<sub>2</sub>O)<sub>2</sub>, respectively.

The inferred relationships between H<sub>2</sub>O<sub>2</sub> and the concentrations of H<sub>2</sub>O and (H<sub>2</sub>O)<sub>2</sub>

are shown as Eqs. (S4)–(S7):

$$\frac{SCI_{H_2O}}{SCI_I} = \frac{\Delta H_2O_2}{SCI_I} = \frac{k_{(SCI+H_2O)I} \cdot [H_2O]}{k_{(SCI+H_2O)I} \cdot [H_2O] + k_{(other)I}} \quad (S4)$$

$$\Delta H_2O_2 = \frac{1}{1 + \frac{k_{(other)I}}{k_{(SCI+H_2O)I} \cdot [H_2O]}} \cdot SCI_I \quad (S5)$$

$$\frac{SCI_{(H_2O)_2}}{SCI_I} = \frac{\Delta H_2O_2}{SCI_I} = \frac{k_{(SCI+(H_2O)_2)I} \cdot [(H_2O)_2]}{k_{(SCI+(H_2O)_2)I} \cdot [(H_2O)_2] + k_{(other)I}} \quad (S6)$$

$$\Delta H_2O_2 = \frac{1}{1 + \frac{k_{(other)I}}{k_{(SCI+(H_2O)_2)I} \cdot [(H_2O)_2]}} \cdot SCI_{S_I} \quad (S7)$$

where SCI<sub>H<sub>2</sub>O</sub> (molecule cm<sup>-3</sup>) is the amount of SCIs reacted with H<sub>2</sub>O; SCI<sub>I</sub> (molecule cm<sup>-3</sup>) is the amount of SCI<sub>I</sub> generated; ΔH<sub>2</sub>O<sub>2</sub> (molecule cm<sup>-3</sup>) is the amount of H<sub>2</sub>O<sub>2</sub> generated; [H<sub>2</sub>O] (molecule cm<sup>-3</sup>) is the concentration of H<sub>2</sub>O; [(H<sub>2</sub>O)<sub>2</sub>] (molecule cm<sup>-3</sup>) is the concentration of (H<sub>2</sub>O)<sub>2</sub>; k<sub>(SCI+H<sub>2</sub>O)I</sub> (cm<sup>3</sup> molecule<sup>-1</sup> s<sup>-1</sup>) is the rate constant of SCI<sub>I</sub> reaction with H<sub>2</sub>O; k<sub>(SCI+(H<sub>2</sub>O)<sub>2</sub>)I</sub> (cm<sup>3</sup> molecule<sup>-1</sup> s<sup>-1</sup>) is the rate constant of SCI<sub>I</sub> reaction with (H<sub>2</sub>O)<sub>2</sub>; k<sub>(other)I</sub> = k<sub>(isomerization)I</sub> + k<sub>(SCI+products)I</sub> · [products], meaning that k<sub>(other)I</sub> accounts for the sum of SCI<sub>I</sub> isomerization and reaction with other products in the system. In Fig. S2, the red line represents the estimated yield of H<sub>2</sub>O<sub>2</sub> based on SCI<sub>I</sub> reaction with H<sub>2</sub>O when k<sub>(SCI+H<sub>2</sub>O)I</sub> is set as 5 × 10<sup>-16</sup> cm<sup>3</sup> molecule<sup>-1</sup> s<sup>-1</sup> and k<sub>(other)I</sub> is 30 s<sup>-1</sup>; the green line represents the estimated yield of H<sub>2</sub>O<sub>2</sub> based on SCI<sub>I</sub> reaction with (H<sub>2</sub>O)<sub>2</sub> when k<sub>(SCI+(H<sub>2</sub>O)<sub>2</sub>)I</sub> is set as 1 × 10<sup>-12</sup> cm<sup>3</sup> molecule<sup>-1</sup> s<sup>-1</sup> and k<sub>(other)I</sub> is 30 s<sup>-1</sup>. The estimation

based on  $\text{SCI}_I$  reaction with  $\text{H}_2\text{O}$  showed a better fitting with the measured results and  $k_{(\text{SCI}+\text{H}_2\text{O})I}$  was used to calculate the amount of SCIs reacted with water.

### **Calculating the amount of exocyclic double bonds (exo-DB) ozonated in bulk phase**

Here the second-generation oxidation at 80% RH was analyzed. Results showed that at 80% RH the amount of exo-DB ozonated was  $\sim 15$  ppbv larger than that under dry condition. Assuming that particles at 80% RH were liquid and exo-DB were ozonated in bulk phase, the amount of exo-DB ozonated in bulk phase could be calculated according to Eq. (S8):

$$\Delta[\text{DB}_{(\text{aq})}] = k_{(\text{aq})} \cdot [\text{O}_{3(\text{aq})}] \cdot [\text{DB}_{(\text{aq})}] \cdot t \quad (\text{S8})$$

where  $\Delta[\text{DB}_{(\text{aq})}]$  ( $\text{mol L}^{-1}$ ) is the amount of exo-DB ozonated in bulk phase;  $k_{(\text{aq})}$  ( $\text{L mol}^{-1} \text{s}^{-1}$ ) is the rate constant of exo-DB ozonated in bulk phase;  $[\text{O}_{3(\text{aq})}]$  ( $\text{mol L}^{-1}$ ) is the concentration of  $\text{O}_3$  in bulk phase;  $[\text{DB}_{(\text{aq})}]$  ( $\text{mol L}^{-1}$ ) is the concentration of exo-DB in bulk phase;  $t$  (s) is the reaction time. During the reaction, although bulk-phase exo-DB and  $\text{O}_3$  were consumed, gas-phase  $\text{O}_3$  and SVOCs containing exo-DB would constantly enter bulk phase, and it was hypothesized that both of  $[\text{O}_{3(\text{aq})}]$  and  $[\text{DB}_{(\text{aq})}]$  could maintain stable during reaction. Based on measurement results, the average SOA mass concentration in the second-generation oxidation was around  $50 \mu\text{g m}^{-3}$ , and  $\Delta[\text{DB}_{(\text{aq})}]$  was derived to be  $15.94 \text{ mol L}^{-1}$ .  $[\text{O}_{3(\text{aq})}]$  was calculated through Henry's law as Eq. (S9):

$$H_{O_3} = \frac{[O_{3(aq)}]}{P_{O_3}} \quad (S9)$$

where  $H_{O_3}$  ( $\text{mol L}^{-1} \text{Pa}^{-1}$ ) is the Henry's law constant of  $O_3$ , which is  $9.28 \times 10^{-8} \text{ mol L}^{-1} \text{Pa}^{-1}$  at 298 K (Sander, 2015);  $P_{O_3}$  (Pa) is the partial pressure of  $O_3$  in the gas phase. It was calculated that  $[O_{3(aq)}]$  was  $1.10 \times 10^{-7} \text{ mol L}^{-1}$ , and the rate constant of unsaturated first-generation oxidation products ozonated in aqueous phase was reported to be about  $4.0 \times 10^4 \text{ L mol}^{-1} \text{s}^{-1}$  (Witkowski et al., 2018a, b), according to which  $[DB_{(aq)}]$  was derived to be  $15.09 \text{ mol L}^{-1}$ . Assuming that the molecular weight of unsaturated first-generation products was  $200 \text{ g mol}^{-1}$ , the density of those particulate unsaturated compounds was  $3.02 \text{ g cm}^{-3}$ , which was even larger than the aerosol density of  $1.30 \text{ g cm}^{-3}$ , suggesting that bulk-phase ozonolysis was not able to explain the large amount of exo-DB ozonated under high-humidity conditions.

### **Estimating the uptake coefficient of unsaturated first-generation products on aqueous aerosols**

Here the second-generation oxidation at 80% RH was analyzed. The uptake coefficient of unsaturated first-generation products can be estimated when simplifying the heterogeneous reaction as a pseudo-first-order reaction using Eq. (S10) (Ravishankara, 1997):

$$\gamma = \frac{4k}{\omega A} \quad (S10)$$

where  $\gamma$  is the uptake coefficient of unsaturated products;  $k$  ( $\text{s}^{-1}$ ) is the rate constant of pseudo-first-order reaction;  $\omega$  ( $\text{m s}^{-1}$ ) is the mean molecular velocity;  $A$  ( $\text{m}^2 \text{m}^{-3}$ ) is the total surface area concentration of particles.  $\omega$  is calculated using Eq. (S11):

$$\omega = \sqrt{\frac{8RT}{\pi M_x}} \quad (\text{S11})$$

where  $R$  ( $\text{J mol}^{-1} \text{K}^{-1}$ ) is the gas constant;  $T$  (K) is the absolute temperature;  $M_x$  ( $\text{kg mol}^{-1}$ ) is the molar weight of unsaturated first-generation products, which is assumed to be  $0.2 \text{ kg mol}^{-1}$  and  $\omega$  is derived as  $178 \text{ m s}^{-1}$ . During the second-generation oxidation the amount of exo-DB ozonated through heterogeneous reaction at 80% RH was around 15 ppbv, and since the heterogeneous reaction process here was treated as a pseudo-first-order reaction,  $k$  could be calculated through Eq. (S12):

$$\Delta[\text{DB}] = k \cdot [\text{O}_3] \cdot t \quad (\text{S12})$$

where  $\Delta[\text{DB}]$  ( $\text{molecule cm}^{-3}$ ) is the amount of exo-DB ozonated through heterogeneous reaction;  $[\text{O}_3]$  ( $\text{molecule cm}^{-3}$ ) is the concentration of  $\text{O}_3$ ;  $t$  (s) is the reaction time.  $\text{O}_3$  concentration in the second-generation oxidation was 11.9 ppmv and the reaction time was 240 s, so  $k$  was calculated to be  $5.25 \times 10^{-6} \text{ s}^{-1}$ . The surface area concentration of aerosols in the second-generation oxidation was estimated to be  $\sim 4 \times 10^{-5} \text{ m}^2 \text{m}^{-3}$ , and  $\gamma$  was derived to be  $2.95 \times 10^{-3}$ .

### **SOA formation in the first-generation oxidation**

Growth curves of SOA mass concentration and SOA yield in the first-generation oxidation are shown in Fig. S4. It is noted that the SOA growth curve at certain RH is

similar to the curve at the adjacent RH, and for instance, SOA growth curves of 10% and 20% RH are similar with each other. The same situation is observed between conditions of 30% and 40% RH, and SOA growth above 60% RH seems unchanged with RH increasing. To better identify SOA growth curves at different RH in the picture, conditions of < 0.5%, 10%, 30%, 50%, 70%, and 90% RH are chosen to show.

### **Estimating the amount of SCIs scavenged by excess AA**

When adding excess AA ( $10.0 \pm 0.4$  ppmv) into the reaction system, the amount of SCIs consumed by AA could be estimated as Eq. (S13):

$$\frac{SCI_{AA}}{SCI} = \frac{k_{(SCI+AA)} \cdot [AA]}{k_{(SCI+H_2O)} \cdot [H_2O] + k_{(other)}} \quad (S13)$$

where  $SCI_{AA}$  (molecule  $\text{cm}^{-3}$ ) is the amount of SCIs reacted with AA;  $SCI$  (molecule  $\text{cm}^{-3}$ ) is the amount of SCI generated;  $[AA]$  (molecule  $\text{cm}^{-3}$ ) is the concentration of AA;  $[H_2O]$  (molecule  $\text{cm}^{-3}$ ) is the concentration of  $H_2O$ ;  $k_{(SCI+AA)}$  ( $\text{cm}^3 \text{ molecule}^{-1} \text{ s}^{-1}$ ) is the rate constant of SCI reaction with AA;  $k_{(SCI+H_2O)}$  ( $\text{cm}^3 \text{ molecule}^{-1} \text{ s}^{-1}$ ) is the rate constant of SCI reaction with  $H_2O$ ;  $k_{(other)} = k_{(isomerization)I} + k_{(SCI+products)} \cdot [\text{products}]$ , meaning that  $k_{(other)}$  accounts for the sum of SCI isomerization and reaction with other products in the system. Using the parameters derived in the study, reactions of  $SCI_I$  and  $SCI_{II}$  were both considered and it was calculated that even under 90% RH the concentration of AA used was sufficient for scavenging more than 99% of SCIs generated during reactions.

### The fraction of SCIs converting into SOA ( $\alpha_{SCI}$ )

The slope of the fitting line of SOA versus SCIs represents the amount of SOA contributed by per unit concentration of SCIs, which is denoted as  $SOA_{perSCI}$ . When taking the average of the slopes in the first- and second-generation oxidations,  $SOA_{perSCI}$  under dry and low-humidity conditions was calculated to be  $1.39 \mu\text{g m}^{-3}$ , and under high-humidity conditions  $SOA_{perSCI}$  was  $2.46 \mu\text{g m}^{-3}$ . In theory, if all SCIs could convert into SOA by producing low-volatile products, of which the molar mass was assumed to be  $200 \text{ g mol}^{-1}$ , it was estimated that  $SOA_{perSCI}$  was  $8.17 \mu\text{g m}^{-3}$ . As the molar mass of products formed from monoterpene-derived SCIs was expected to be large (Lee and Kamens, 2005),  $SOA_{perSCI}$  was calculated to be  $12.26 \mu\text{g m}^{-3}$  when assuming the molar mass of the products was  $300 \text{ g mol}^{-1}$ . It was derived that under dry and low-humidity conditions  $\alpha_{SCI}$  was 11–17% and under high-humidity conditions  $\alpha_{SCI}$  was 20–30%.

The amount of SOA formed from SCIs reaction could be estimated as Eqs. (S14) and (S15) when assuming the molar weight of low-volatile products formed from SCIs is  $300 \text{ g mol}^{-1}$ :

$$SOA_{SCI} = \alpha_{SCI} \cdot SCI \cdot \frac{1}{N_A} \cdot 3 \times 10^{14} \quad (S14)$$

$$SOA_{SCI} = 5 \times 10^{-10} \alpha_{SCI} \cdot SCI \quad (S15)$$

where  $SOA_{SCI}$  ( $\mu\text{g m}^{-3}$ ) is the mass concentration of SOA formed from SCIs reaction;  $SCI$  ( $\text{molecule cm}^{-3}$ ) is the amount of SCIs in reaction system;  $\alpha_{SCI}$  is the conversion rate of SCIs that are valid for SOA formation;  $N_A$  ( $6.02 \times 10^{23} \text{ molecule mol}^{-1}$ ) is the

Avogadro constant. When water exists, SCI at different RH could be calculated as

Eqs. (S16) and (S17):

$$SCI = SCI_{Total} - \frac{1}{1 + \frac{k_{(other)I}}{k_{(SCIs+H_2O)I} \cdot [H_2O]}} \cdot SCIs_I \quad (S16)$$

$$SCI = SCI_{Total} - \frac{RH}{RH + 7.8} \cdot SCIs_I \quad (S17)$$

where RH (%) is the relative humidity.

## Figure caption

**Table S1.** Wall loss fractions of SOA mass concentration at different relative humidity (RH).

**Table S2.** The amounts of SCIs (molecule  $\text{cm}^{-3}$ ) under different concentrations of acetic acid (AA, molecule  $\text{cm}^{-3}$ ) and different relative humidity (RH) in the first-generation oxidation.

**Table S3.** The amounts of SCIs (molecule  $\text{cm}^{-3}$ ) under different concentrations of acetic acid (AA, molecule  $\text{cm}^{-3}$ ) and different relative humidity (RH) in the second-generation oxidation.

**Table S4.** The reactants concentrations (ppbv) in calculations of steady-state concentrations of SCIs in forest, urban area, and indoor area.

**Figure S1.** Diagram of the thermostatic coil collector.

**Figure S2.** The dependence of the molar yield of hydrogen peroxide ( $\text{H}_2\text{O}_2$ ) on relative humidity (RH).

**Figure S3.** The variation of the consumption of acetic acid ( $\Delta\text{AA}$ ) with the concentration of acetic acid ( $[\text{AA}]$ ) at different relative humidity (RH) in the second-generation oxidation.

**Figure S4.** Growth curves of (a) SOA mass concentration (SOA) and (b) SOA yield (Y) versus limonene reacted ( $\Delta\text{HC}$ ) at different relative humidity (RH) in the first-generation oxidation.

**Figure S5.** Growth curves of (a) SOA mass concentration (SOA) and (b) SOA yield (Y) versus reaction time at different relative humidity (RH) in the second-generation oxidation.

**Figure S6.** The variation of SOA mass concentration (SOA) with the concentration of acetic acid ([AA]) at different relative humidity (RH) in the second-generation oxidation.

## References

- Boy, M., Mogensen, D., Smolander, S., Zhou, L., Nieminen, T., Paasonen, P., Plass-Dülmer, C., Sipilä, M., Petäjä, T., Mauldin, L., Berresheim, H., and Kulmala, M.: Oxidation of SO<sub>2</sub> by stabilized Criegee intermediate (sCI) radicals as a crucial source for atmospheric sulfuric acid concentrations, *Atmos. Chem. Phys.*, 13, 3865–3879, doi: 10.5194/acp-13-3865-2013, 2013.
- Carslaw, N.: A new detailed chemical model for indoor air pollution, *Atmos. Environ.*, 41, 1164–1179, doi: 10.1016/j.atmosenv.2006.09.038, 2007.
- Fan, H., Zhao, C. F., and Yang, Y. K.: A comprehensive analysis of the spatio-temporal variation of urban air pollution in China during 2014–2018, *Atmos. Environ.*, 220, 117066, doi: 10.1016/j.atmosenv.2019.117066, 2020.
- Gong, Y. W., Chen, Z. M., and Li, H.: The oxidation regime and SOA composition in limonene ozonolysis: roles of different double bonds, radicals, and water, *Atmos. Chem. Phys.*, 18, 15105–15123, doi: 10.5194/acp-18-15105-2018, 2018.
- Hasson, A. S., Ho, A. W., Kuwata, K. T., and Paulson, S. E.: Production of stabilized Criegee intermediates and peroxides in the gas phase ozonolysis of alkenes: 2. Asymmetric and biogenic alkenes, *J. Geophys. Res.*, 106, 34143–34153, doi: 10.1029/2001JD000598, 2001.
- Lawrence, A. J. and Khan, T.: Indoor air quality assessment as related to household conditions in rural houses during winter season, *Environ. Contam.*, 28, 221–244, doi: 10.1007/978-981-10-7332-8\_11, 2017.
- Lee, S. and Kamens, R. M.: Particle nucleation from the reaction of  $\alpha$ -pinene and O<sub>3</sub>, *Atmos. Environ.*, 39, 6822–6832, doi: 10.1016/j.atmosenv.2005.07.062, 2005.
- Paralovo, S. L., Barbosa, C. G. G., Carneiro, I. P. S., Kurzlop, P., Borillo, G. C., Schiochet, M. F. C., Godoi, A. F. L., Yamamoto, C. I., Souza, R. A. F., Andreli, R. V., Ribeiro, I. O., Manzi, A. O., Kourtchev, I., Bustillos, J. O. V., Martin, S. T., and Godoi, R. H. M.: Observations of particulate matter, NO<sub>2</sub>, SO<sub>2</sub>, O<sub>3</sub>, H<sub>2</sub>S and selected VOCs at a semi-urban environment in the Amazon region, *Sci. Total Environ.*, 650, 996–1006, doi: 10.1016/j.scitotenv.2018.09.073, 2019.

Ravishankara, A. R.: Heterogeneous and multiphase chemistry in troposphere, *Science*, 276, 1058–1065, doi: 10.1126/science.276.5315.1058, 1997.

Sander, R.: Compilation of Henry's law constants (version 4.0) for water as solvent, *Atmos. Chem. Phys.*, 15, 4399–4981, doi: 10.5194/acp-15-4399-2015, 2015.

Winterhalter, R., Neeb, P., Grossmann, D., Kolloff, A., Horie, O., and Moortgat, G.: Products and mechanism of the gas phase reaction of ozone with  $\beta$ -pinene, *J. Atmos. Chem.*, 35, 165–197, doi: 10.1023/A:1006257800929, 2000.

Witkowski, B., Al-sharafi, M., and Gierczak, T.: Kinetics of limonene secondary organic aerosol oxidation in the aqueous phase, *Environ. Sci. Technol.*, 52, 11583–11590, doi: 10.1021/acs.est.8b02516, 2018a.

Witkowski, B., Jurdana, S., and Gierczak, T.: Limononic acid oxidation by hydroxyl radicals and ozone in the aqueous phase, *Environ. Sci. Technol.*, 52, 3402–3411, doi: 10.1021/acs.est.7b04867, 2018b.

**Table S1.** Wall loss fractions of SOA mass concentration at different relative humidity (RH).

| RH                     | <0.5%         | 10%           | 20%           | 30%           | 40%           | 50%           | 60%            | 70%            | 80%            | 90%            |
|------------------------|---------------|---------------|---------------|---------------|---------------|---------------|----------------|----------------|----------------|----------------|
| Wall loss fraction (%) | 7.21<br>±0.72 | 6.57<br>±0.77 | 6.88<br>±0.82 | 7.02<br>±0.93 | 7.65<br>±0.95 | 8.21<br>±0.88 | 11.29<br>±0.90 | 13.04<br>±1.21 | 15.67<br>±1.16 | 17.10<br>±1.45 |

**Table S2.** The amounts of SCIs (molecule  $\text{cm}^{-3}$ ) under different concentrations of acetic acid (AA, molecule  $\text{cm}^{-3}$ ) and different relative humidity (RH) in the first-generation oxidation.

| RH<br>AA              | < 0.5%                | 10%                   | 40%                   | 60%                   | 80%                   |
|-----------------------|-----------------------|-----------------------|-----------------------|-----------------------|-----------------------|
| 0.00                  | $2.66 \times 10^{11}$ | $1.84 \times 10^{11}$ | $1.45 \times 10^{11}$ | $1.38 \times 10^{11}$ | $1.21 \times 10^{11}$ |
| $5.90 \times 10^{11}$ | $1.85 \times 10^{11}$ | $1.66 \times 10^{11}$ | $1.38 \times 10^{11}$ | $1.27 \times 10^{11}$ | $1.19 \times 10^{11}$ |
| $1.18 \times 10^{12}$ | $1.16 \times 10^{11}$ | $1.03 \times 10^{11}$ | $8.30 \times 10^{10}$ | $9.81 \times 10^{10}$ | $9.01 \times 10^{10}$ |
| $2.36 \times 10^{12}$ | $6.94 \times 10^{10}$ | $6.29 \times 10^{10}$ | $6.10 \times 10^{10}$ | $6.41 \times 10^{10}$ | $6.04 \times 10^{10}$ |
| $3.54 \times 10^{12}$ | $5.17 \times 10^{10}$ | $4.16 \times 10^{10}$ | $2.56 \times 10^{10}$ | $5.24 \times 10^{10}$ | $4.35 \times 10^{10}$ |
| $4.72 \times 10^{12}$ | $2.80 \times 10^{10}$ | $1.65 \times 10^{10}$ | $1.19 \times 10^{10}$ | $2.74 \times 10^{10}$ | $2.90 \times 10^{10}$ |
| $5.90 \times 10^{12}$ | $1.21 \times 10^{10}$ | $4.57 \times 10^9$    | $3.82 \times 10^9$    | $1.39 \times 10^{10}$ | $1.93 \times 10^{10}$ |
| $7.08 \times 10^{12}$ | $2.95 \times 10^9$    | $2.26 \times 10^9$    | $-2.58 \times 10^9$   | $-2.22 \times 10^9$   | $7.73 \times 10^9$    |
| $8.27 \times 10^{12}$ | $1.23 \times 10^9$    | $1.83 \times 10^9$    | $-5.57 \times 10^9$   | $1.28 \times 10^9$    | $5.31 \times 10^9$    |
| $9.45 \times 10^{12}$ | $-1.97 \times 10^9$   | $1.89 \times 10^9$    | $-3.52 \times 10^9$   | $3.69 \times 10^9$    | $3.55 \times 10^9$    |
| $1.06 \times 10^{13}$ | $2.46 \times 10^9$    | $1.78 \times 10^9$    | $-5.45 \times 10^8$   | $3.25 \times 10^9$    | $5.09 \times 10^9$    |
| $1.18 \times 10^{13}$ | $-4.92 \times 10^8$   | $-9.65 \times 10^8$   | $-4.40 \times 10^8$   | $3.85 \times 10^9$    | $5.55 \times 10^9$    |

Note: The negative values appearing in the table were caused by the errors of measurements under high AA concentration.

**Table S3.** The amounts of SCIs (molecule  $\text{cm}^{-3}$ ) under different concentrations of acetic acid (AA, molecule  $\text{cm}^{-3}$ ) and different relative humidity (RH) in the second-generation oxidation.

| RH<br>AA              | < 0.5%                | 10%                   | 40%                   | 60%                   | 80%                   |
|-----------------------|-----------------------|-----------------------|-----------------------|-----------------------|-----------------------|
| 0.00                  | $2.21 \times 10^{11}$ | $1.60 \times 10^{11}$ | $1.29 \times 10^{11}$ | $1.65 \times 10^{11}$ | $2.41 \times 10^{11}$ |
| $5.90 \times 10^{11}$ | $1.45 \times 10^{11}$ | $1.38 \times 10^{11}$ | $1.13 \times 10^{11}$ | $1.12 \times 10^{11}$ | $1.77 \times 10^{11}$ |
| $1.18 \times 10^{12}$ | $1.01 \times 10^{11}$ | $1.02 \times 10^{11}$ | $8.79 \times 10^{10}$ | $9.10 \times 10^{10}$ | $1.09 \times 10^{11}$ |
| $2.36 \times 10^{12}$ | $6.05 \times 10^{10}$ | $5.33 \times 10^{10}$ | $6.16 \times 10^{10}$ | $6.13 \times 10^{10}$ | $7.84 \times 10^{10}$ |
| $3.54 \times 10^{12}$ | $5.49 \times 10^{10}$ | $4.50 \times 10^{10}$ | $5.54 \times 10^{10}$ | $5.47 \times 10^{10}$ | $4.68 \times 10^{10}$ |
| $4.72 \times 10^{12}$ | $4.75 \times 10^{10}$ | $4.49 \times 10^{10}$ | $4.61 \times 10^{10}$ | $4.79 \times 10^{10}$ | $2.86 \times 10^{10}$ |
| $5.90 \times 10^{12}$ | $3.84 \times 10^{10}$ | $2.98 \times 10^{10}$ | $3.79 \times 10^{10}$ | $2.55 \times 10^{10}$ | $1.49 \times 10^{10}$ |
| $7.08 \times 10^{12}$ | $1.97 \times 10^{10}$ | $1.91 \times 10^{10}$ | $2.88 \times 10^{10}$ | $2.24 \times 10^{10}$ | $1.21 \times 10^{10}$ |
| $8.27 \times 10^{12}$ | $1.21 \times 10^{10}$ | $9.06 \times 10^9$    | $1.94 \times 10^{10}$ | $2.16 \times 10^{10}$ | $1.03 \times 10^{10}$ |
| $9.45 \times 10^{12}$ | $9.84 \times 10^8$    | $6.89 \times 10^9$    | $1.38 \times 10^{10}$ | $1.85 \times 10^{10}$ | $1.01 \times 10^{10}$ |
| $1.06 \times 10^{13}$ | $-2.46 \times 10^8$   | $1.10 \times 10^9$    | $1.31 \times 10^{10}$ | $1.74 \times 10^{10}$ | $1.05 \times 10^{10}$ |
| $1.18 \times 10^{13}$ | $-2.46 \times 10^8$   | $9.78 \times 10^8$    | $1.24 \times 10^{10}$ | $1.77 \times 10^{10}$ | $1.03 \times 10^{10}$ |

Note: The negative values appearing in the table were caused by the errors of measurements under high AA concentration.

**Table S4.** The reactants concentrations (ppbv) in calculations of steady-state

concentrations of SCIs in forest, urban area, and indoor area.

|             | Limonene | O <sub>3</sub> | SO <sub>2</sub> | NO <sub>2</sub> |
|-------------|----------|----------------|-----------------|-----------------|
| Forest      | 0.18     | 45             | 1 <sup>1</sup>  | 2 <sup>2</sup>  |
| Urban area  | 0.15     | 45             | 10 <sup>3</sup> | 17 <sup>4</sup> |
| Indoor area | 2        | 20             | 10 <sup>5</sup> | 17 <sup>6</sup> |

<sup>1</sup> Boy et al., 2013; Paralovo et al., 2019

<sup>2</sup> Paralovo et al., 2019

<sup>3</sup> Fan et al., 2020

<sup>4</sup> Fan et al., 2020

<sup>5</sup> Lawrence and Khan, 2017

<sup>6</sup> Carslaw, 2007

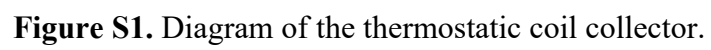

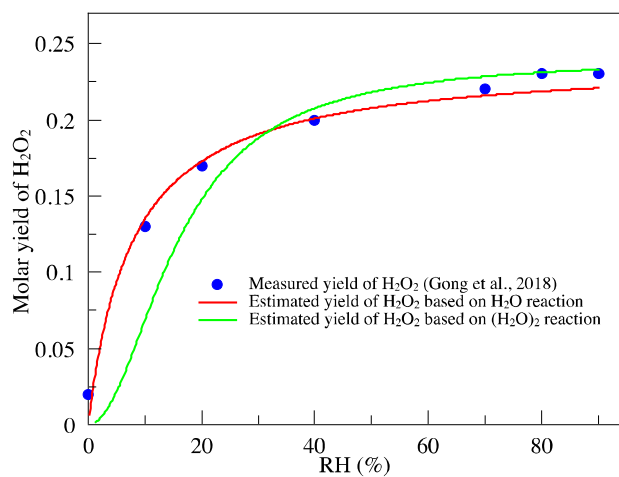

**Figure S2.** The dependence of the molar yield of hydrogen peroxide ( $\text{H}_2\text{O}_2$ ) on relative humidity (RH). Blue dots: the measured yield of  $\text{H}_2\text{O}_2$ ; Red line: the estimated yield of  $\text{H}_2\text{O}_2$  based on  $\text{SCI}_1$  reaction with  $\text{H}_2\text{O}$ ; Green line: the estimated yield of  $\text{H}_2\text{O}_2$  based on  $\text{SCI}_1$  reaction with  $(\text{H}_2\text{O})_2$ .

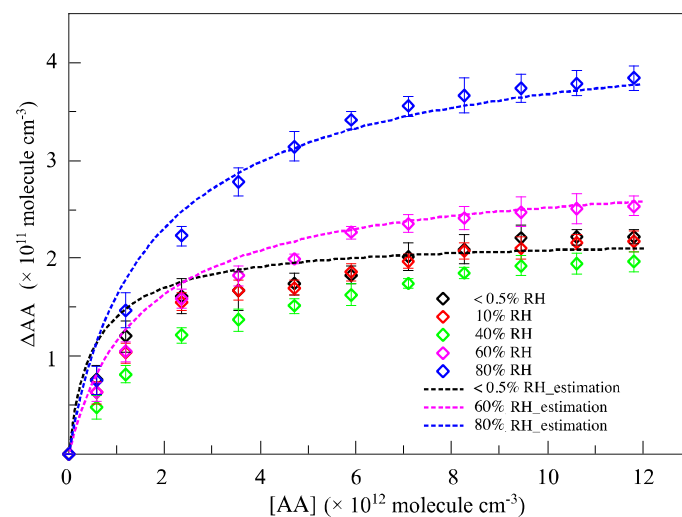

**Figure S3.** The variation of the consumption of acetic acid ( $\Delta AA$ ) with the concentration of acetic acid ( $[AA]$ ) at different relative humidity (RH) in the second-generation oxidation. Scatters: measured  $\Delta AA$ ; Black line: estimated  $\Delta AA$  at < 0.5% RH; Pink line: estimated  $\Delta AA$  at 60% RH; Blue line: estimated  $\Delta AA$  at 80% RH.

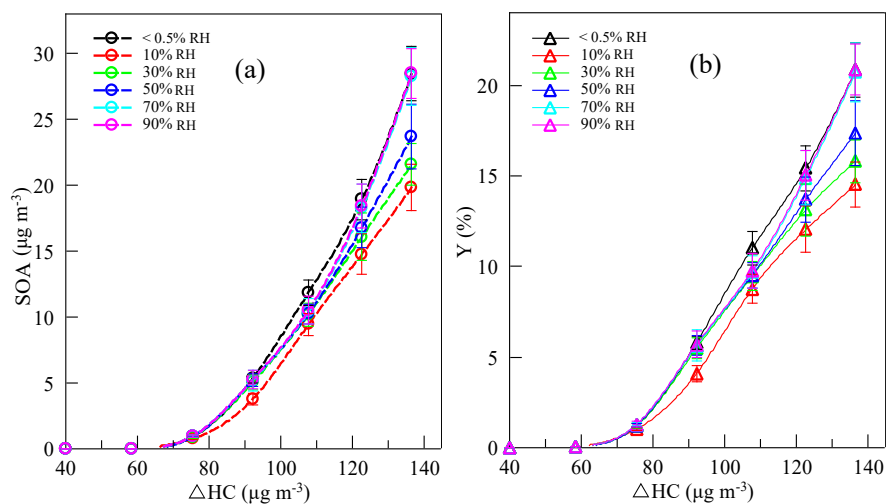

**Figure S4.** Growth curves of (a) SOA mass concentration (SOA) and (b) SOA yield (Y) versus limonene reacted ( $\Delta\text{HC}$ ) at different relative humidity (RH) in the first-generation oxidation.

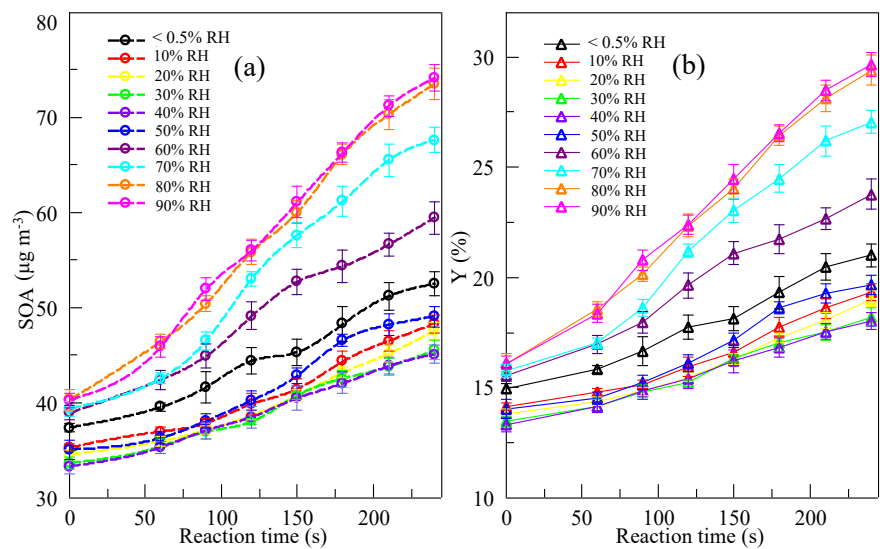

**Figure S5.** Growth curves of (a) SOA mass concentration (SOA) and (b) SOA yield (Y) versus reaction time at different relative humidity (RH) in the second-generation oxidation.

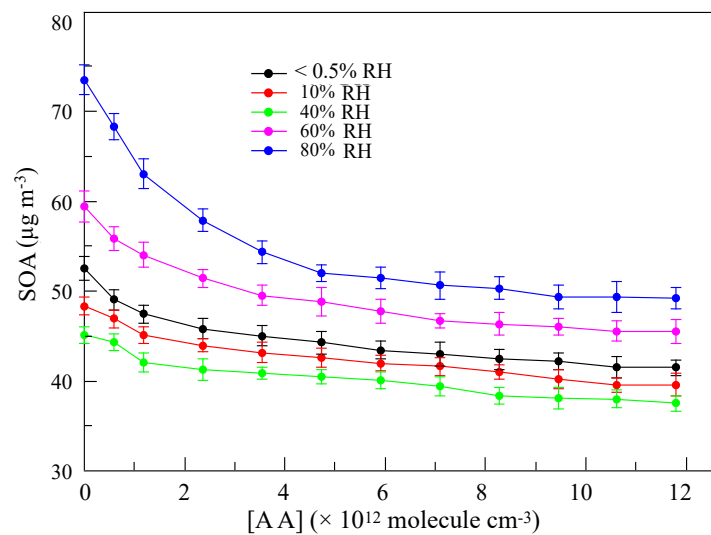

**Figure S6.** The variation of SOA mass concentration (SOA) with the concentration of acetic acid ([AA]) at different relative humidity (RH) in the second-generation oxidation.
